# Supplementary material for: Wide band gap pyromellitic diimides for photo stable n-channel thin film transistors
Source: Royal Society of Chemistry journal article supplement (doi:10.1039/d0tc00862a), 2020-01-01
Supplement: d0tc00862a1.pdf [file d0tc00862a1.pdf]

## Supporting Information

### Wide Band Gap Pyromellitic Diimides for Photo Stable n-Channel Thin

#### Film Transistors

By Jianing Wang,<sup>a</sup> Huinan Yu,<sup>a</sup> Tianchen Fu,<sup>c</sup> Changbin Zhao,<sup>c</sup> Hongtao Yu,<sup>a,c</sup> Zhijun Liu,<sup>d</sup> Qiang He,<sup>d</sup> Dongwei Zhang,<sup>\*b</sup> Hong Meng,<sup>c</sup> and Wei Huang<sup>a,d</sup>

<sup>a</sup>Key Laboratory of Flexible Electronics (KLOFE) & Institute of Advanced Materials (IAM), Jiangsu National Synergetic Innovation Center for Advanced Materials (SICAM), Nanjing Tech University (NanjingTech), 30 South Puzhu Road, Nanjing 211816, China

<sup>b</sup>The institute for Solid State Physics, The University of Tokyo, 5-1-5 Kashiwanoha, Kashiwa, Chiba 277-8581, Japan

<sup>c</sup>School of Advanced Materials, Peking University Shenzhen Graduate School, Peking University, Shenzhen, 518055, China

<sup>d</sup>School of Natural and Applied Sciences, Northwestern Polytechnical University, Xi'an, Shaanxi 710129, China.

\*E-mail: [zhangdw@issp.u-tokyo.ac.jp](mailto:zhangdw@issp.u-tokyo.ac.jp); [iamhmeng@njtech.edu.cn](mailto:iamhmeng@njtech.edu.cn)

### Synthesis procedures of PyDI-BOCF<sub>3</sub>

Pyromellitic dianhydride (1.16 g, 5.32 mmol), zinc acetate (0.25 g, 1.36 mmol) and acetic acid (1.5 ml) were suspended in anhydrous DMF (100 mL) and stirred at room temperature for 30 min. Then 4-(trifluoromethylthio)benzylamine (3.05 g, 15.96 mmol) was added into the above mixture with heating process at 60 °C for 30 min. Under the stirring condition, it was further heated to 180 °C for 12 h in the inert system. After cooling, the mixture was poured into ice water and the precipitate was collected by filtration. Thereafter, the collected product was washed by water and methanol solution. After drying, it was further purified by using a 5-zone furnace under high vacuum sublimation for twice to obtain the pure crystal compounds (yield: 81 %). <sup>1</sup>H NMR (300 MHz, DMSO-d<sub>6</sub>) δ 8.25 (s, 2H, Ph-H), 7.50 (d, J = 8.7 Hz, 4H, Ph-H), 7.34 (d, J = 7.9 Hz, 4H, Ph-H), 4.86 (s, 4H, CH<sub>2</sub>). <sup>13</sup>C NMR (101 MHz, CDCl<sub>3</sub>): δ 165.67, 149.10, 137.25, 134.12, 130.46, 121.32, 118.64, 41.52, 29.71. Elemental anal.calcd for C<sub>26</sub>H<sub>14</sub>F<sub>6</sub>N<sub>2</sub>O<sub>6</sub>: C, 55.33; H, 2.50; F, 20.20; N, 4.96; O, 17.01; Found C, 54.86; H, 2.30; N, 4.95. The synthesis procedure of PyDI-BSCF<sub>3</sub> is similar to PyDI-BOCF<sub>3</sub> (Yield:80 %).

### Experimental

<sup>1</sup>H and <sup>13</sup>C NMR spectra of soluble intermediates were recorded on a Bruker DRX NMR spectrometer operating at 300 MHz in Dimethylsulfoxide-d solutions. Cyclic voltammetry was tested on CH Instruments Inc CHI660E. Three-electrode system including glassy carbon as the working electrode, Pt disk as the counter electrode, and non-aqueous Ag/Ag<sup>+</sup> as the reference electrode was used in this case. Voltammograms were performed in Dry N,N-Dimethylformamide (DMF) solution versus Ag/Ag<sup>+</sup> using tetrabutylammonium hexafluorophosphate (Bu<sub>4</sub>NPF<sub>6</sub>) as electrolyte and ferrocene as inner standard at a scan rate of 100 mV/s. The UV-vis spectra were tested on Shimadzu UV-1750U spectrophotometer. Thermogravimetric analysis (TGA) measurements were performed on Perkin Elmer TGA7 at a heating

rate of 10 °C/min in nitrogen atmosphere. Differential scanning calorimetry (DSC) were analysed by Netzsch calorimeter model Polyma DSC 214 at a heating and cooling rates of 10 °C/min in nitrogen atmosphere. The morphology of the thin-films were obtained by using the tapping mode of MultiMode 8 atomic force microscope (Bruker, German) in the glove box. The XRD patterns were perform on a Bruker D8 advance X-ray diffractometer equipped with a Cu K $\alpha$  source ( $\lambda = 1.541 \text{ \AA}$ ). Density functional theory (DFT) calculations of the molecular geometry and electronic sturcture were optimized for isolated molecules in a gas phase, using B3LYP gradient-corrected functional and the 6-311G(d,p) basis set in Gaussian 09 program. The transfer integral calculations were performed on PW91 functional (GGA:PW91) and the basis set of triple-Z 2 plus polarization functions (TZ2P) in Amsterdam Density Functional (ADF) program.

**Table S1:** Single Crystal parameters of PyDI-BOCF<sub>3</sub> and PyDI-BSCF<sub>3</sub>

|                      | PyDI-BOCF <sub>3</sub>    |                       | PyDI-BSCF <sub>3</sub>     |                        |
|----------------------|---------------------------|-----------------------|----------------------------|------------------------|
| Space group          | P -1                      |                       | P -1                       |                        |
| Unit cell dimensions | a = 4.6859 Å (5)          | $\alpha$ = 86.980°(7) | a = 4.7270 Å (6)           | $\alpha$ = 85.692° (6) |
|                      | b = 6.1771 Å (6)          | $\beta$ = 89.653°(8)  | b = 6.3735 Å (4)           | $\beta$ = 87.707° (9)  |
|                      | c = 19.2053 Å (15)        | $\gamma$ = 88.699°(9) | c = 19.4848 Å (16)         | $\gamma$ = 86.270° (7) |
| Cell Volume          | 554.98 Å <sup>3</sup> (9) |                       | 583.77 Å <sup>3</sup> (10) |                        |

**Table S2:** The observed distances of all short contacts in PyDI-BOCF<sub>3</sub> and PyDI-BSCF<sub>3</sub> crystals

| Material               | Bond distance                   | $t_1$ | $t_2$ | $t_3$ | $t_4$ |
|------------------------|---------------------------------|-------|-------|-------|-------|
| PyDI-BOCF <sub>3</sub> | <i>Centroid Distance</i><br>(Å) | 4.686 | 7.668 | 6.177 | 7.838 |
|                        | <i>C-O</i> (Å)                  | 3.128 | 3.212 | 3.207 | -     |
|                        |                                 |       |       | 3.207 |       |
|                        |                                 |       |       | 3.200 |       |
|                        |                                 |       |       | 3.200 |       |
|                        | <i>O-H</i> (Å)                  | -     | 2.629 | -     | -     |
|                        |                                 |       | 2.629 |       |       |
|                        |                                 |       | 2.413 |       |       |
|                        |                                 |       | 2.413 |       |       |
|                        | <i>C-C</i> (Å)                  | 3.383 | -     | -     | -     |
|                        |                                 | 3.383 |       |       |       |
|                        |                                 | 3.282 |       |       |       |
| PyDI-BSCF <sub>3</sub> | <i>Centroid Distance</i><br>(Å) | 4.727 | 7.684 | 6.374 | 8.178 |
|                        | <i>C-O</i> (Å)                  | 3.210 | 3.220 | 3.173 | -     |
|                        |                                 | 3.210 | 3.220 | 3.173 |       |
|                        | <i>O-H</i> (Å)                  | -     | 2.616 | -     | -     |
|                        |                                 |       | 2.616 |       |       |
|                        |                                 |       | 2.383 |       |       |
|                        |                                 |       | 2.383 |       |       |
|                        | <i>C-C</i> (Å)                  | 3.388 | -     | -     | -     |
|                        |                                 | 3.388 |       |       |       |
|                        |                                 | 3.368 |       |       |       |



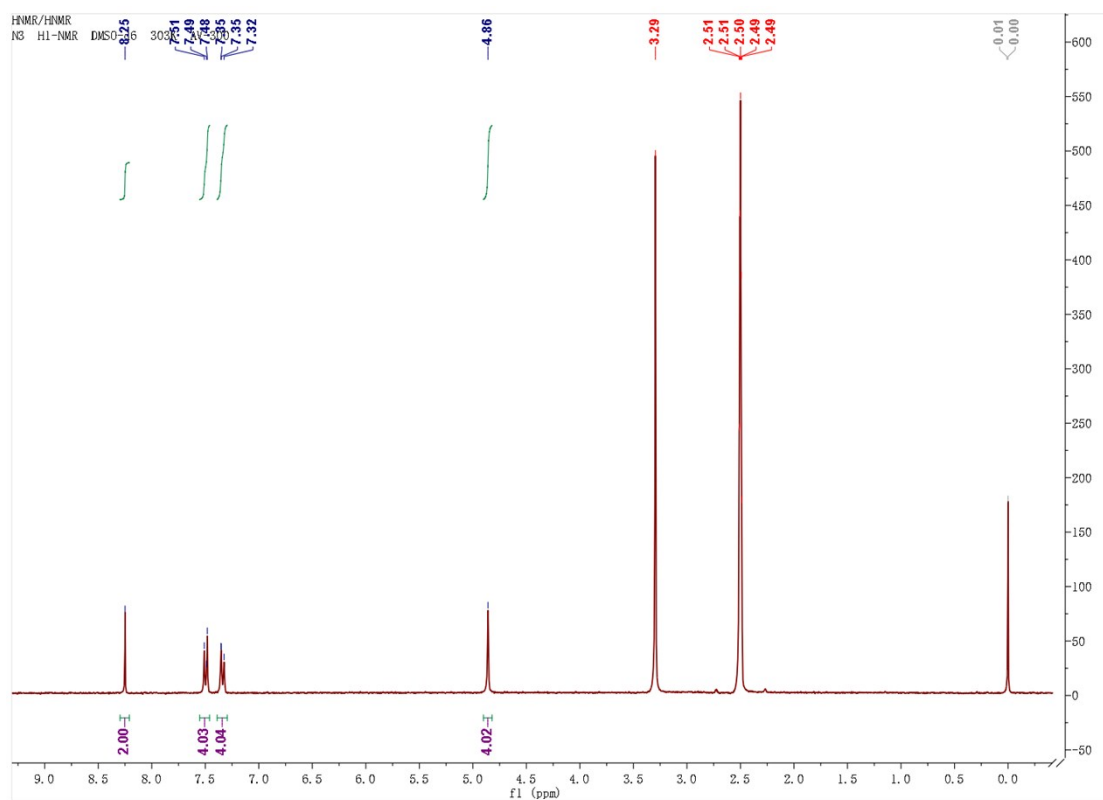

**Figure S1:** <sup>1</sup>H NMR Spectrum of PyDI-BOCF<sub>3</sub>.

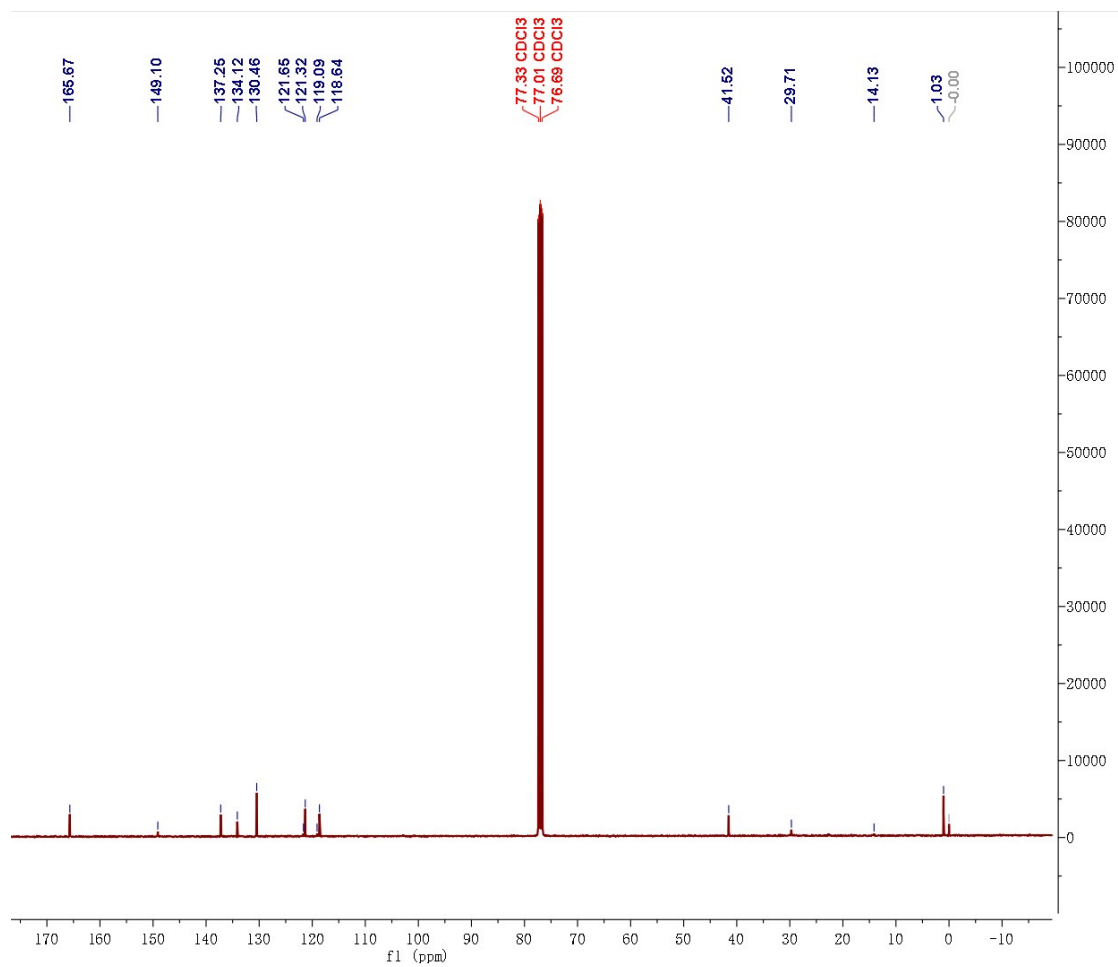

**Figure S2:** <sup>13</sup>C NMR Spectrum of PyDI-BOCF<sub>3</sub>.



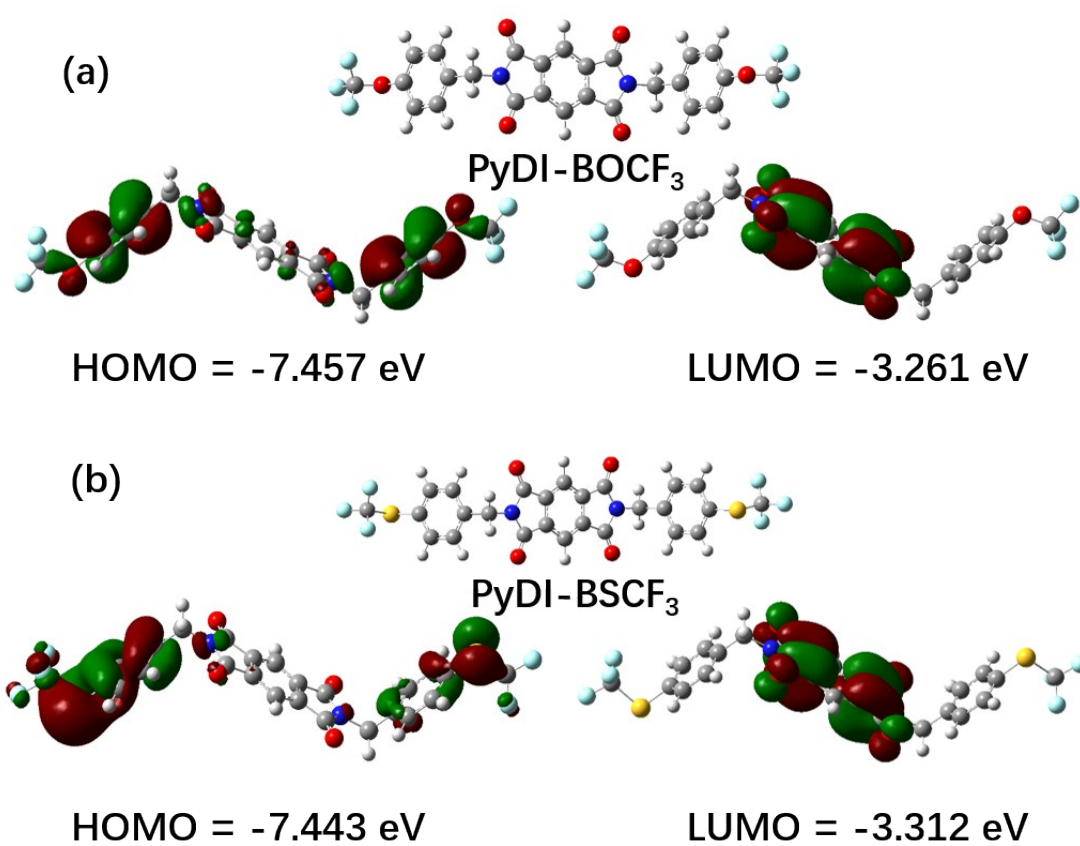

**Figure S3:** The molecular orbital surfaces of HOMO and LUMO of PyDI-BOCF<sub>3</sub> and PyDI-BSCF<sub>3</sub>, calculated at the DFT B3LYP/6-31G.

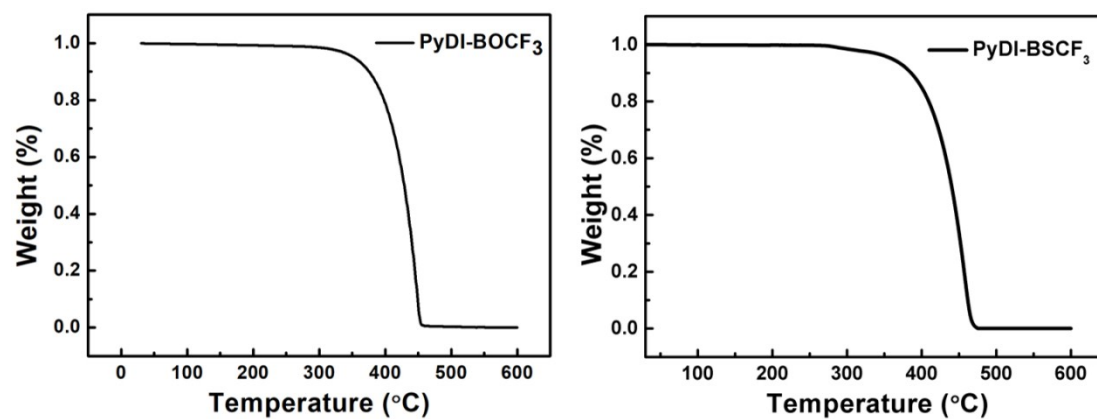

**Figure S4:** TGA analysis of PyDI-BOCF<sub>3</sub> and PyDI-BSCF<sub>3</sub>

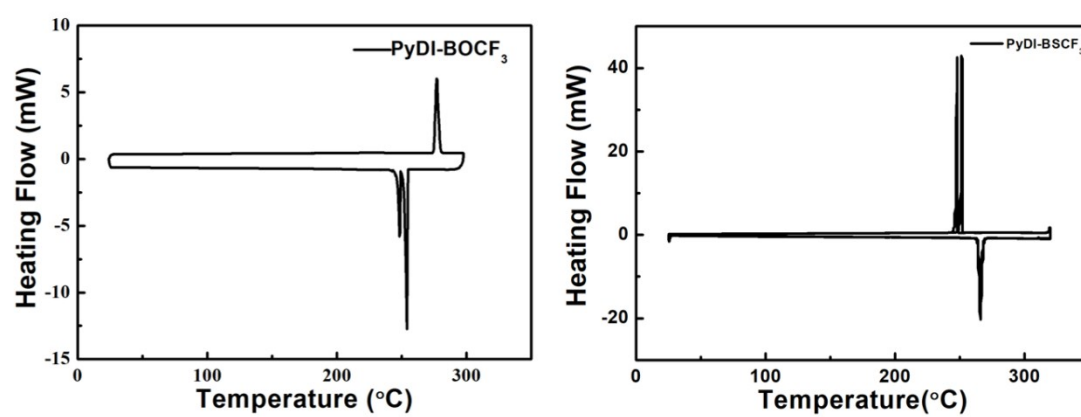

**Figure S5:** DSC analysis of PyDI-BOCF<sub>3</sub> and PyDI-BSCF<sub>3</sub>

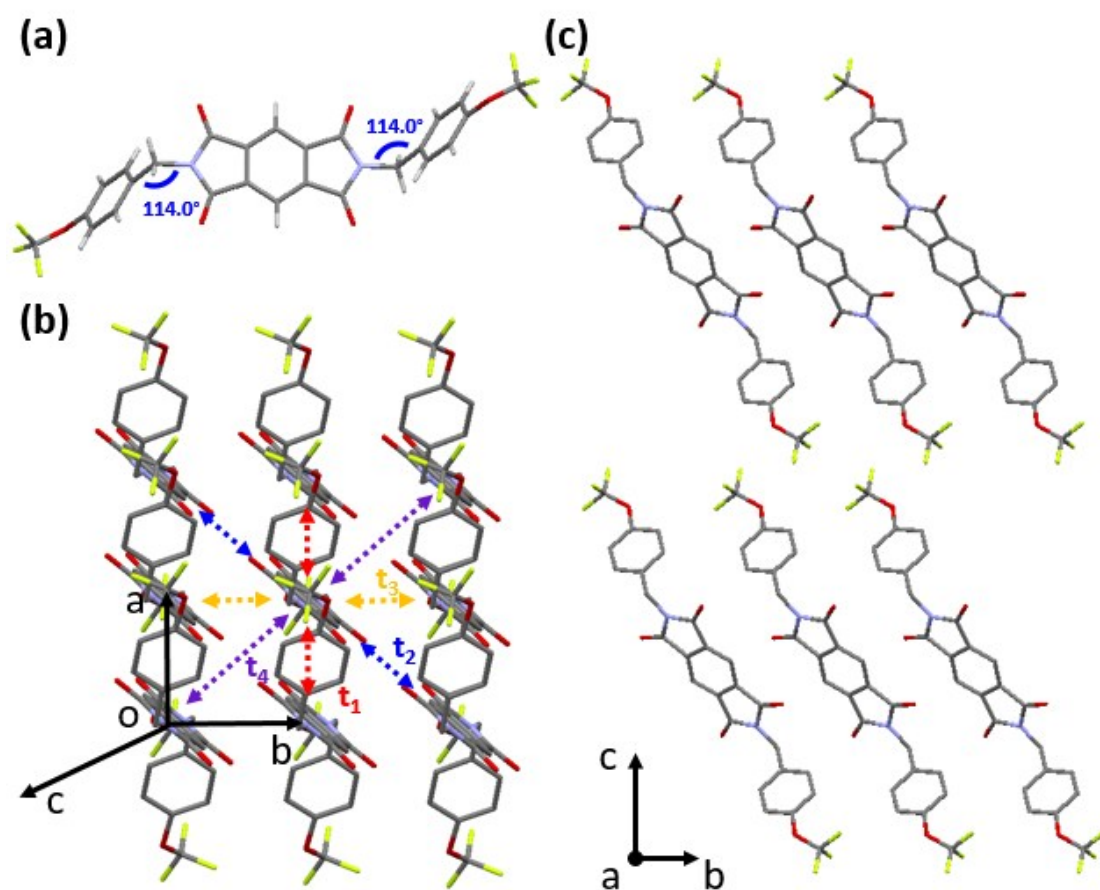

**Figure S6:** (a) Molecular structure and (b,c) molecular packing of PyDI-BOCF3 (unit cell:  $a = 4.49$ ,  $b = 6.18$ ,  $c = 19.21$ ;  $\alpha = 87.0^\circ$ ,  $\beta = 89.7^\circ$ ,  $\gamma = 88.7^\circ$ ).

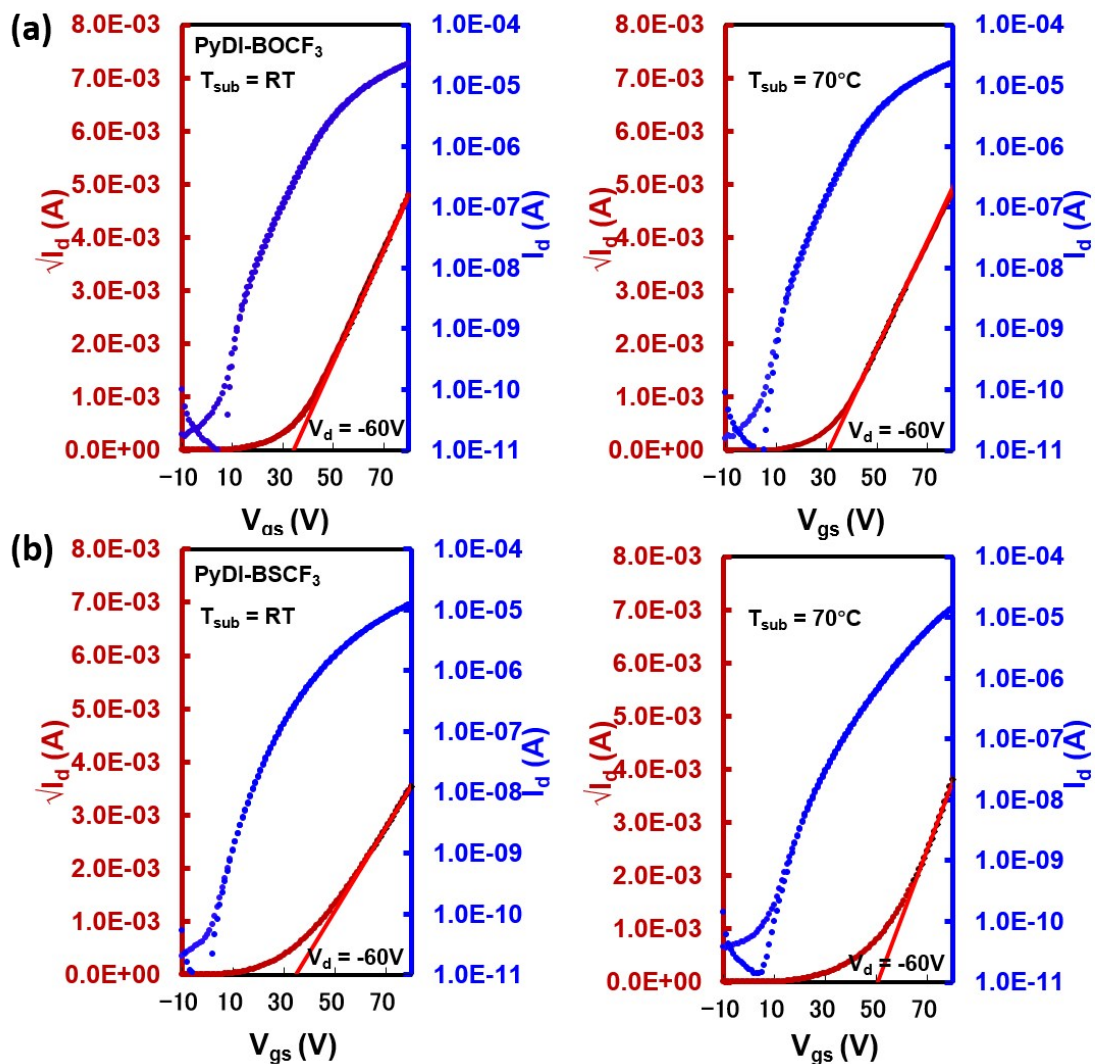

**Figure S7:** The hysteresis of the transfer curves for PyDI-BSCF<sub>3</sub> (a) and PyDI-BOCF<sub>3</sub> (b) based OTFTs deposited at temperature of rt and 70 °C on the OTS-treated Si/SiO<sub>2</sub> substrate.

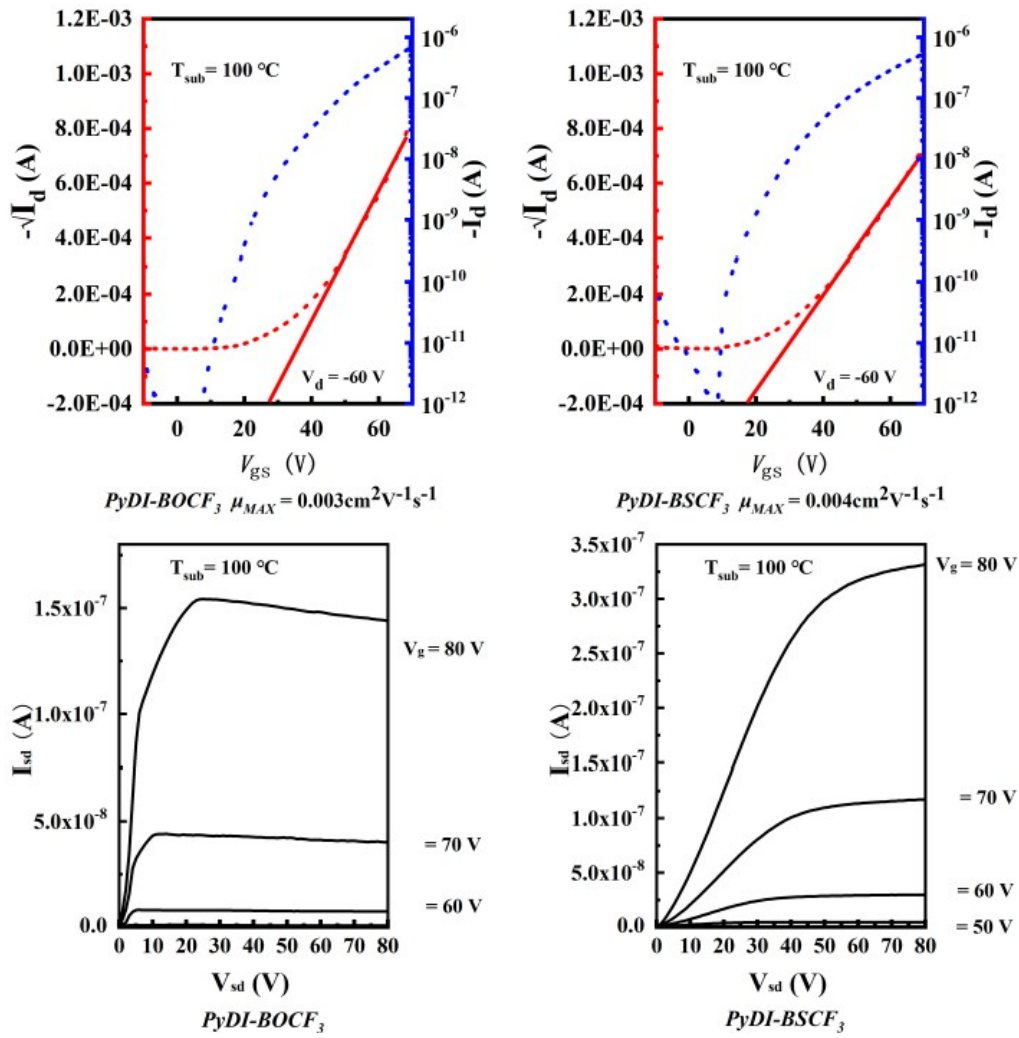

**Figure S8:** The hysteresis of the transfer curves for PyDI-BSCF<sub>3</sub> (a) and PyDI-BOCF<sub>3</sub> (b) based OTFTs deposited at temperature of 100 °C on the OTS-treated Si/SiO<sub>2</sub> substrate.



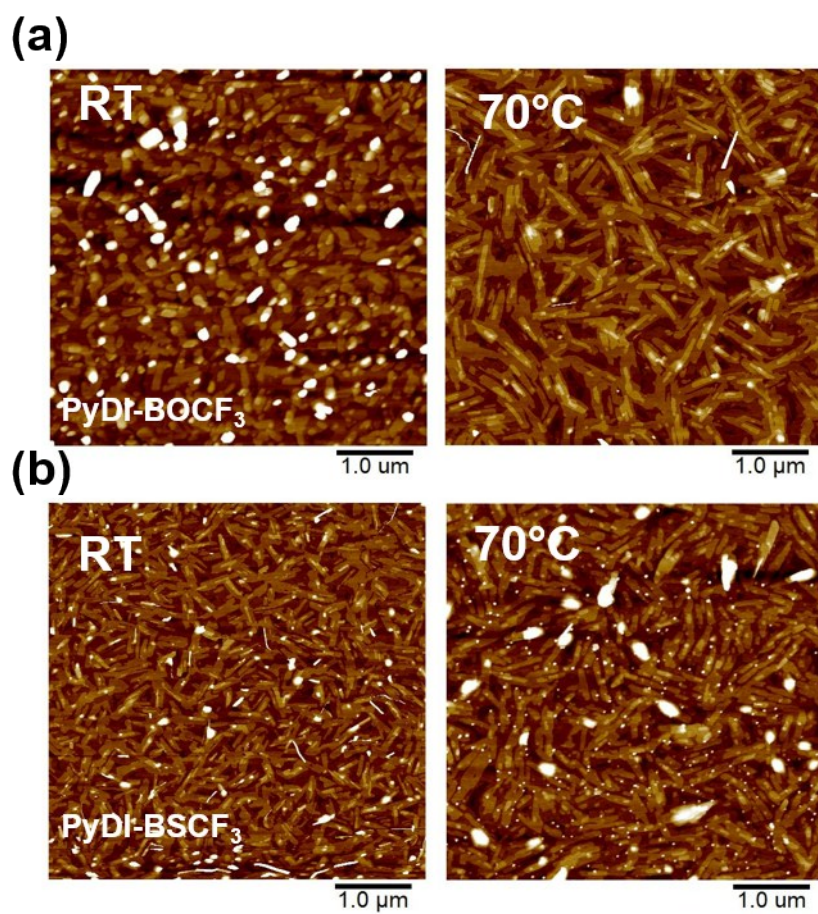

**Figure S9:** The tapping mode AFM images (5 μm) of PyDI-BOCF<sub>3</sub> (b) and PyDI-BSCF<sub>3</sub> (c) thin films deposited at RT and 70°C
